# Supplementary material for: CELF4 Modulates Neuropathic Pain Development by Regulating Pain-related Molecular Targets
Source: Research Square preprint supplement (doi:10.21203/rs.3.rs-8628072/v1), 2026-01-22
Supplement: Supplementary file 1 [file f457a28a161be6c27855dfca.docx]

| genes |  | sequences |
| --- | --- | --- |
| *Celf4* | For | GCAAGTGTACAATGGGGCCTA |
| Rev | AAAGTTTGGTCCTTTGGTCCCT |
| *Gapdh* | For | CATGGCCTTCCGTATTCCTA |
| Rev | GCCTGCTTCACCACCTTCTT |
| *Trpv1* | For | GGCTGTCTTCATCATCCTGCTGCT |
| Rev | GTTCTTGCTCTCCTGTGCGATCTTGT |
| *P2x3* | For | TCTCCAGCAGAGACATCAGCA |
| Rev | GGGAGCATCTTGGTGAACTCAG |
| *Nav 1.8* | For | GTGTGCATGACCCGAACTGAT |
| Rev | CAAAACCCTCTTGCCAGTATCT |
| *Nav 1.9* | For | CAGTCGTCCTAGCAGTAACA |
| Rev | TCCGATGACAATGAAGTCCA |
| *Cgrp* | For | GGACTTGGAGACAAACCACCA |
| Rev | GAGAGCAACCAGAGAGGAACTACA |
| *Cox2* | For | CCGGGTACAATCGCACTTAT |
| Rev | GGCGCTCAGCCATACAG |
| *Celf4*-shRNA | For | CTGCTGCCTATGGTCAGATTA |
| Rev | TAATCTGACCATAGGCAGCAG |
| Scramble-shRNA | For | UUCUCCGAACGUGUCACGU |
| Rev | ACGUGAACAGUUGCGGAGAA |

shRNA and primer sequences of quantitative PCR
